# Supplementary material for: The Solvent-Dependent Photophysics of Diphenyloctatetraene
Source: PubMed Central journal article supplement (PMC10544004; doi:10.1021/acs.jpcb.3c03737), 2023-09-14
Supplement: jp3c03737_si_001.pdf [file jp3c03737_si_001.pdf]

# **The Solvent Dependent Photophysics of Diphenyloctatetraene**

Daniel W. Polak,<sup>‡</sup> Alexandros D. P. Hannon, Guilherme A. Marczak Giorio,  
Olivia A. Hawkins and Thomas A. A. Oliver\*

School of Chemistry, Cantock's Close, University of Bristol, Bristol, BS8 1TS, UK

<sup>‡</sup> Current address: Department of Chemistry, University of Leicester,  
Leicester LE1 7RH, UK

\*Author for correspondence: [tom.oliver@bristol.ac.uk](mailto:tom.oliver@bristol.ac.uk)

## 1. Franck-Condon Modelling

The vibronic structure within experimental absorption and fluorescence of DPO in solution were modelled using a simple displaced harmonic oscillator Franck-Condon model, as previously outlined in refs. <sup>1,2</sup>. The model relies on the following assumptions: (i) electronic transitions couple to a single dominant vibrational mode; (ii) all vibronic peaks have the same full-width half-maximum; (iii) the associated line shape for all peaks is the same and Gaussian; (iv) the Franck-Condon progression ignores effects of anharmonicity.

The intensity of the vibronic progressions should follow a Poisson distribution, as described by Equations S1 and S2 for fluorescence and absorption respectively:

$$I_{Fl}(E) = (n_E E)^3 \sum_m \left( e^{-S} \frac{S^m}{m!} e^{-\left(\frac{E-(E_0-m\omega_{\text{vib}})}{\sigma}\right)^2} \right) \quad (\text{S1})$$

$$I_{Abs}(E) = (n_E E) \sum_m \left( e^{-S} \frac{S^m}{m!} e^{-\left(\frac{E-(E_0+m\omega_{\text{vib}})}{\sigma}\right)^2} \right) \quad (\text{S2})$$

where,  $I_{Fl}(E)$  and  $I_{Abs}(E)$  are the intensity of the fluorescence and absorption as a function of energy  $E$  (in eV), and  $n_E$  is the energy dependent refractive index.  $\omega_{\text{vib}}$  is the associated energy with the Franck-Condon active vibrational mode and  $S$  the associated Huang-Rhys factor,  $m$  is the vibrational quantum number,  $E_0$  is the electronic origin associated with  $m = 0$ , and  $\sigma$  determines the Gaussian linewidth of each vibrational peak, as defined by the full-width half-maximum =  $2\sigma\sqrt{2\ln 2}$ .

Modelled absorption and fluorescence spectra for DPO in cyclohexane (overlaid with experimental data) are shown in Figure S1. The same parameters,  $S = 1.27$ ,  $\omega_{\text{vib}} = 0.188 \pm 0.001$  eV ( $1520 \pm 10$  cm<sup>-1</sup>) and  $\sigma = 140$  meV, were used to model the absorption spectra of DPO in all 10 different solvents, only altering  $E_0$ , which is derived from experimental data (see Table

1 in main manuscript). For fluorescence spectra, good agreement with experimental data was achieved using  $\omega_{\text{vib}} = 0.172 \pm 0.001$  eV ( $1390 \pm 10$  cm<sup>-1</sup>) and  $\sigma = 162$  meV. The electronic origin was experimentally derived, however, unlike absorption spectra, the Huang-Rhys factor for fluorescence varied between 2.27 and 2.45 between different solvents, as expected for fluorescence intensity derived from a Herzberg-Teller intensity borrowing mechanism.

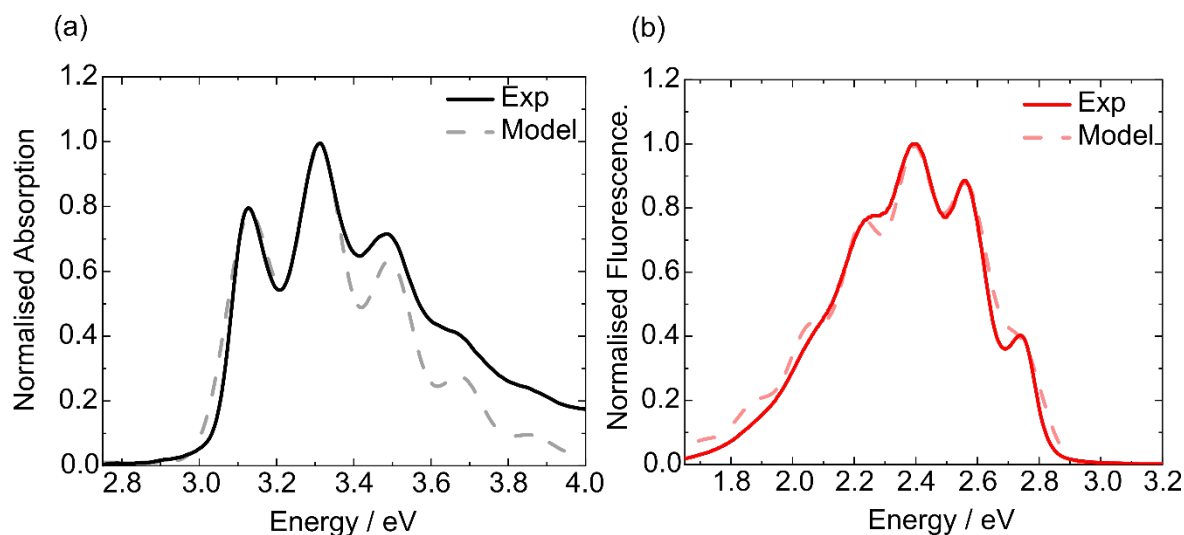

**Figure S1** Comparison of steady state normalised (a) absorption and (b) fluorescence data of DPO in cyclohexane with Franck-Condon model (dashed line) of data. Details of parameters used are given in the text.

## 2. DFT and TD-DFT calculated minimum energy structures

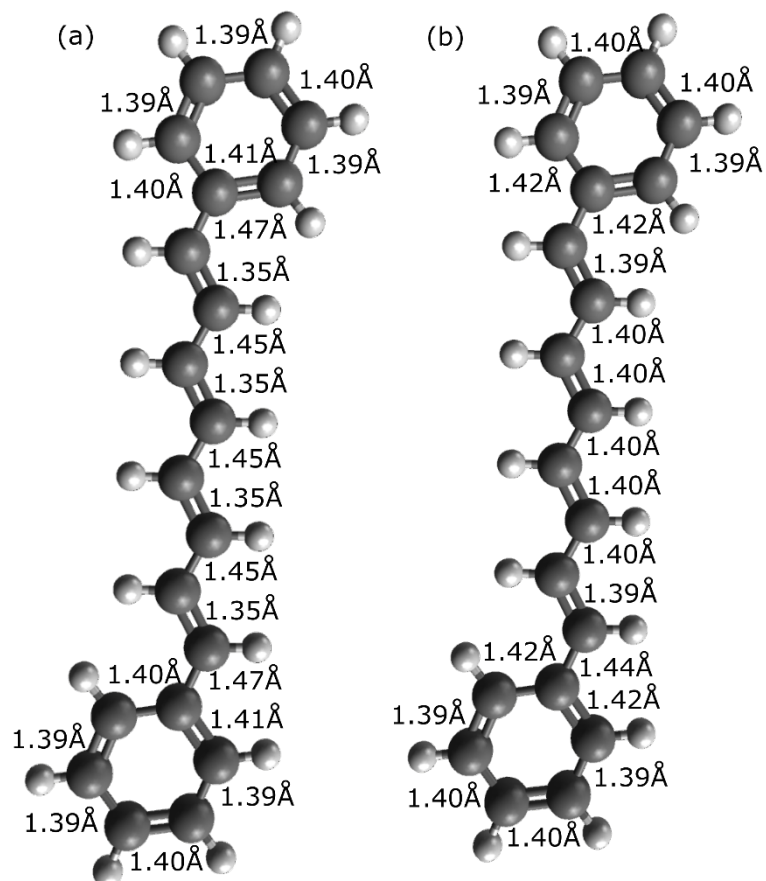

**Figure S2** Minimum energy geometries of the (a)  $S_0$  and (b)  $1B_u$  states of DPO. Bond lengths associated with the polyene chain and terminal phenyl rings are overlaid.

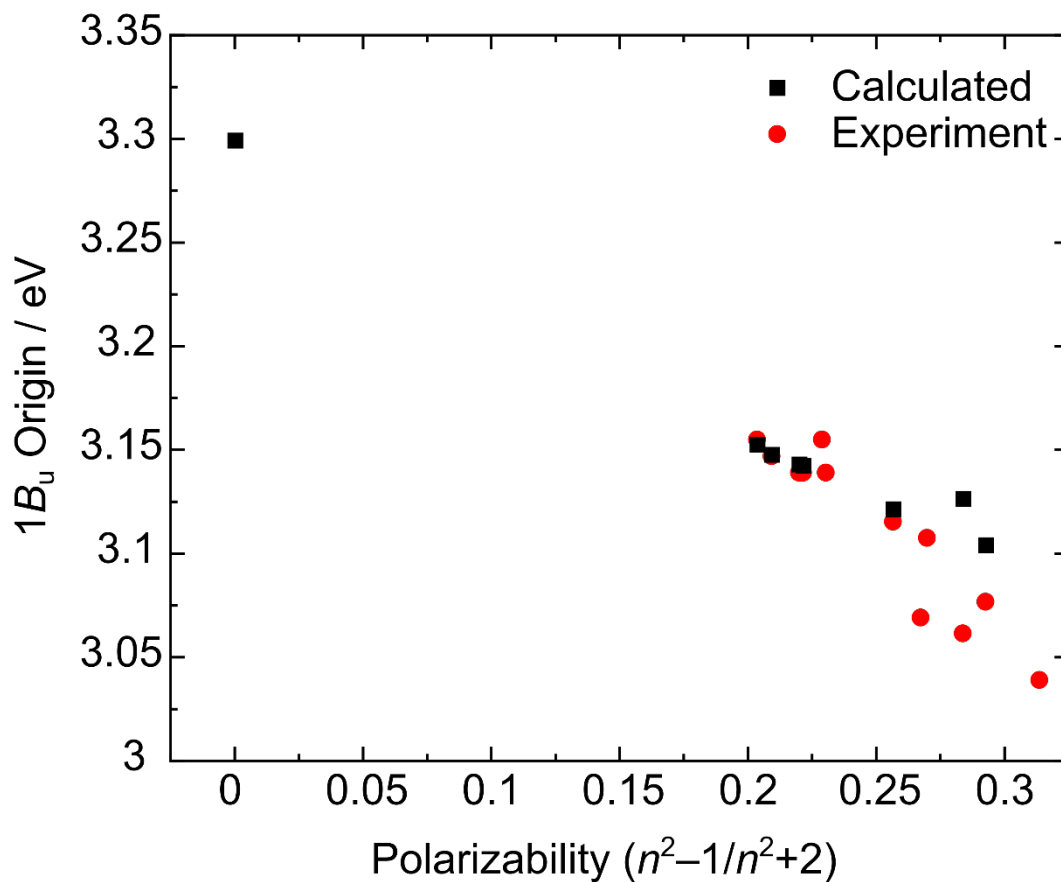

**Figure S3** Comparison of experimental and calculated vertical  $1B_u$  excitation energies as a function of solvent polarizability. The calculated excitation energies have been shifted by  $-160$  meV to aid comparison.

### 3. Instrument Response Function

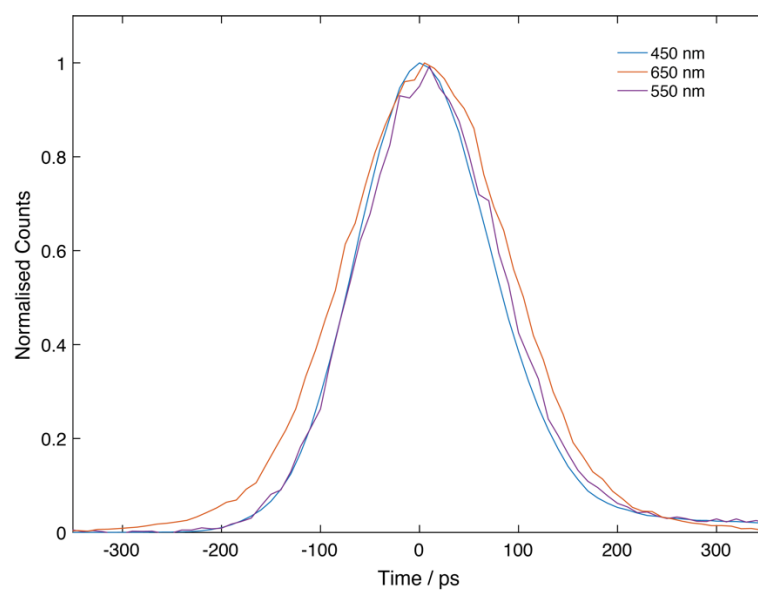

**Figure S4** Instrument response function measured by solvent scatter for three displayed laser excitation wavelengths.

#### 4. WR-TCSPC Spectra

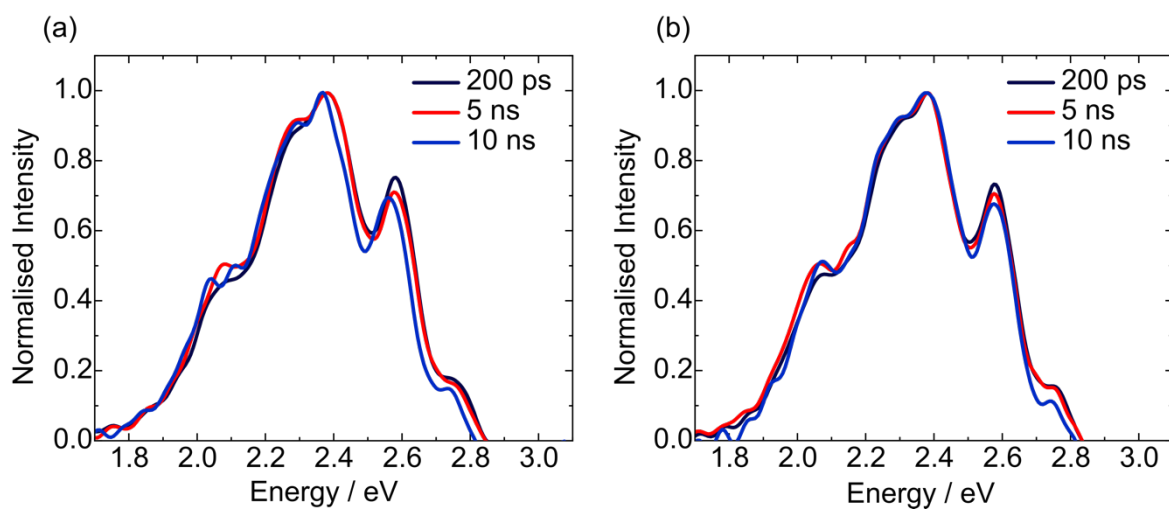

**Figure S5** Normalised fluorescence spectra averaged over 200 ps windows from WR-TCSPC measurements of DPO in (a) *n*-hexane and (b) ethanol for a series of delays shown in the legend.

## References

- (1) Köhler, A.; Bäessler, H. *Electronic Processes in Organic Semiconductors*; Wiley-VCH Verlag GmbH & Co. KGaA: Weinheim, 2015.
- (2) Saidani, M. A.; Benfredj, A.; Hamed, Z. B.; Romdhane, S.; Ulbricht, C.; Egbe, D. A. M.; Bouchriha, H. Franck-Condon Analysis of the Photoluminescence Spectra of a Triple-Bond Containing Polymer as a Solution and as a Thin Film. *Synth. Met.* **2013**, *184*, 83–85.
